# Supplementary material
Source: publisher figshare collection journal article supplement (https://geolsoc.figshare.com/ndownloader/files/29062441)
Supplement: Supplementary file 1 [file 29062441]

## Sheet: Table C1 - Arc Olivine Data
Supplemental Document 3 - Arc Olivine
Transcrustal Magmatic Systems: Evidence from Andesites of the Southern Taupo Volcanic Zone
Journal of the Geological Society
Christopher Svoboda (Michigan State University); Tyrone Rooney (Michigan State University); Guillaume Girard (Northern Illinois University);
Chad Deering (Michigan Technological University)
Corresponding Author: Christopher Svoboda svoboda6@msu.edu
Sample Number	Citation (See Table C2 for full citation)	FeOT (WT%)	MgO (WT%)	CaO (WT%)	MnO (WT%)	NiO (WT%)	Cr (PPM)	Co (PPM)	Ni (PPM)	Fo*	Ni (PPM)	Ca (PPM)	Cr (PPM)	Mn (PPM)	Ni/Co
samp. A	[11037] Ghiara MR (1979)	12.02	46.85	-	0.21	-	425	122	995	87.4123	995	-	425	1626.35	8.15574
samp. 1	[11037] Ghiara MR (1979)	10.37	47.66	-	0.19	-	475	122	1349	89.1166	1349	-	475	1471.46	11.0574
samp. 36	[11037] Ghiara MR (1979)	15.83	44.32	0.51	0.19	-	298	163	983	83.3003	983	3644.88	298	1471.46	6.03067
samp. 10	[11037] Ghiara MR (1979)	18.93	40.42	0.34	0.24	-	297	191	933	79.1849	933	2429.92	297	1858.68	4.88482
samp. 11OL-1	[13241] Davi M (2009)	23.58	39.36	0.29	0.51	-	69	145	350	74.836	350	2072.58	69	3949.7	2.41379
samp. 11OL-2	[13241] Davi M (2009)	23.15	38.58	0.32	0.51	-	112	242	676	74.8056	676	2286.99	112	3949.7	2.79339
samp. 11OL-B1	[13241] Davi M (2009)	23.6	38	0.33	0.51	-	424	256	499	74.1518	499	2358.45	424	3949.7	1.94922
samp. LIP211	[19952] Forni F (2015)	20.84	40.8	0.26	0.24	0.06	22	221	464	77.7186	464	1858.18	22	1858.68	2.09955
samp. LIP211	[19952] Forni F (2015)	19.37	41.84	0.17	0.28	0.02	21	232	508	79.3747	508	1214.96	21	2168.46	2.18966
samp. LIP319	[19952] Forni F (2015)	21.46	39.38	0.32	0.48	0.16	112	238	714	76.5774	714	2286.99	112	3717.36	3
samp. LIP319	[19952] Forni F (2015)	22.3	38.35	0.24	0.6	0.02	1209	249	491	75.3933	491	1715.24	1209	4646.71	1.97189
samp. LIP319	[19952] Forni F (2015)	22.43	37.48	0.31	0.52	0	26	252	548	74.8559	548	2215.52	26	4027.14	2.1746
samp. LIP319	[19952] Forni F (2015)	23.24	38.32	0.33	0.28	0.1	13	255	442	74.6045	442	2358.45	13	2168.46	1.73333
samp. LIP319	[19952] Forni F (2015)	22.53	37.89	0.29	0.55	0.07	110	257	458	74.9767	458	2072.58	110	4259.48	1.7821
samp. 1941 BASALT	[21387] Kamenetsky VS (2017)	8.81204	50.2388	0.216453	0.158589	0.355169	316.904	133.011	2790.96	91.0373	2790.96	1546.95	316.904	1228.19	20.9829
samp. 1941 BASALT	[21387] Kamenetsky VS (2017)	8.94772	50.0077	0.205403	0.150538	0.369831	343.909	135.036	2906.17	90.8737	2906.17	1467.98	343.909	1165.84	21.5215
samp. 1941 BASALT	[21387] Kamenetsky VS (2017)	11.2327	48.4696	0.196491	0.191093	0.228207	208.266	146.392	1793.27	88.4897	1793.27	1404.29	208.266	1479.92	12.2498
samp. 1941 BASALT	[21387] Kamenetsky VS (2017)	11.2128	48.4165	0.186106	0.191602	0.228825	200.468	146.586	1798.13	88.4966	1798.13	1330.07	200.468	1483.86	12.2667
samp. 1941 BASALT	[21387] Kamenetsky VS (2017)	11.4354	48.0937	0.192451	0.195235	0.234405	211.07	148.63	1841.98	88.2256	1841.98	1375.42	211.07	1512	12.393
samp. 1941 BASALT	[21387] Kamenetsky VS (2017)	11.2256	48.2527	0.205012	0.192729	0.222606	216.19	148.727	1749.26	88.4503	1749.26	1465.19	216.19	1492.59	11.7615
samp. 1941 BASALT	[21387] Kamenetsky VS (2017)	11.4333	48.0369	0.233354	0.198904	0.205386	199.677	153.344	1613.95	88.2153	1613.95	1667.75	199.677	1540.42	10.525
samp. OSG	[21668] Zelenski ME (2018)	10.23	49.8937	0.163699	0.182529	0.121618	295.169	123.859	956.116	89.6794	956.116	1169.93	295.169	1413.6	7.71937
samp. OSG	[21668] Zelenski ME (2018)	10.115	50.1753	0.165786	0.181474	0.117715	318.91	124.396	925.436	89.8351	925.436	1184.84	318.91	1405.43	7.43943
samp. OSG	[21668] Zelenski ME (2018)	10.0074	50.015	0.167702	0.179426	0.123934	297.358	126.365	974.32	89.9033	974.32	1198.54	297.358	1389.57	7.71036
samp. OSG	[21668] Zelenski ME (2018)	10.9961	49.252	0.162373	0.192286	0.0872917	205.793	132.136	686.255	88.8642	686.255	1160.45	205.793	1489.16	5.19357
samp. OMI	[21668] Zelenski ME (2018)	8.81204	50.2388	0.216453	0.158589	0.355169	316.904	133.011	2790.96	91.0373	2790.96	1546.95	316.904	1228.19	20.9829
samp. MI	[21668] Zelenski ME (2018)	8.81204	50.2388	0.216453	0.158589	0.355169	316.904	133.011	2790.96	91.0373	2790.96	1546.95	316.904	1228.19	20.9829
samp. OMI	[21668] Zelenski ME (2018)	8.94772	50.0077	0.205403	0.150538	0.369831	343.909	135.036	2906.17	90.8737	2906.17	1467.98	343.909	1165.84	21.5215
samp. MI	[21668] Zelenski ME (2018)	8.94772	50.0077	0.205403	0.150538	0.369831	343.909	135.036	2906.17	90.8737	2906.17	1467.98	343.909	1165.84	21.5215
samp. OSG	[21668] Zelenski ME (2018)	8.47036	51.6534	0.17487	0.142181	0.376992	376.849	135.47	2963.77	91.5716	2963.77	1249.77	376.849	1101.12	21.8777
samp. OMI	[21668] Zelenski ME (2018)	8.85927	50.2352	0.187379	0.150993	0.31888	324.4	135.912	2505.79	90.993	2505.79	1339.17	324.4	1169.37	18.4368
samp. OSG	[21668] Zelenski ME (2018)	7.76014	51.4115	0.170835	0.13531	0.460686	395.363	136.29	3621.74	92.1896	3621.74	1220.93	395.363	1047.91	26.5737
samp. OMI	[21668] Zelenski ME (2018)	9.3541	49.829	0.189794	0.15738	0.337044	335.027	137.007	2648.52	90.4678	2648.52	1356.43	335.027	1218.83	19.3313
samp. OMI	[21668] Zelenski ME (2018)	9.42589	49.7537	0.184934	0.160717	0.331759	312.587	137.185	2607	90.3885	2607	1321.69	312.587	1244.68	19.0036
samp. OMI	[21668] Zelenski ME (2018)	9.08027	49.9972	0.222562	0.158972	0.306539	301.298	137.607	2408.81	90.7493	2408.81	1590.61	301.298	1231.16	17.505
samp. OSG	[21668] Zelenski ME (2018)	8.28674	51.3484	0.180292	0.14001	0.373477	348.8	137.699	2936.14	91.6942	2936.14	1288.52	348.8	1084.31	21.3229
samp. OSG	[21668] Zelenski ME (2018)	8.65681	51.4464	0.18856	0.151391	0.32203	372.52	139.465	2531.69	91.3704	2531.69	1347.6	372.52	1172.45	18.1529
samp. OMI	[21668] Zelenski ME (2018)	9.32824	49.7762	0.202494	0.162055	0.262322	330.764	140.359	2061.35	90.4825	2061.35	1447.19	330.764	1255.04	14.6863
samp. OMI	[21668] Zelenski ME (2018)	9.77329	49.4222	0.198321	0.16459	0.31045	283.674	140.376	2439.55	90.0095	2439.55	1417.37	283.674	1274.67	17.3787
samp. OMI	[21668] Zelenski ME (2018)	9.53483	49.6056	0.180378	0.163263	0.296968	289.914	140.404	2333.6	90.262	2333.6	1289.13	289.914	1264.39	16.6206
samp. OMI	[21668] Zelenski ME (2018)	9.83022	49.5152	0.184224	0.166057	0.322341	300.249	140.649	2532.99	89.9741	2532.99	1316.62	300.249	1286.03	18.0092
samp. OSG	[21668] Zelenski ME (2018)	8.62962	50.9501	0.18324	0.151707	0.359364	348.615	140.864	2825.18	91.3187	2825.18	1309.58	348.615	1174.9	20.0561
samp. OSG	[21668] Zelenski ME (2018)	8.78812	50.6712	0.187797	0.153492	0.368972	352.174	140.924	2900.72	91.129	2900.72	1342.15	352.174	1188.72	20.5835
samp. OMI	[21668] Zelenski ME (2018)	9.81424	49.4474	0.1782	0.167883	0.331664	280.709	140.958	2606.25	89.9764	2606.25	1273.57	280.709	1300.17	18.4895
samp. OSG	[21668] Zelenski ME (2018)	8.68713	51.0095	0.153899	0.147765	0.345894	323.427	140.972	2719.29	91.2751	2719.29	1099.89	323.427	1144.37	19.2895
samp. OSG	[21668] Zelenski ME (2018)	8.83018	51.2043	0.193199	0.154259	0.280425	320.306	141.92	2204.6	91.1749	2204.6	1380.76	320.306	1194.66	15.5341
samp. OSG	[21668] Zelenski ME (2018)	8.20398	51.2419	0.174663	0.144582	0.34915	376.862	142.207	2744.89	91.7547	2744.89	1248.29	376.862	1119.71	19.3021
samp. OSG	[21668] Zelenski ME (2018)	10.0061	50.2541	0.19142	0.172931	0.209528	270.183	142.519	1647.23	89.9477	1647.23	1368.05	270.183	1339.26	11.5579
samp. OSG	[21668] Zelenski ME (2018)	9.66687	50.0241	0.235644	0.169473	0.108632	297.521	142.755	854.023	90.2149	854.023	1684.11	297.521	1312.49	5.98244
samp. OSG	[21668] Zelenski ME (2018)	10.8872	49.1756	0.17518	0.19211	0.10251	221.255	143.037	805.897	88.947	805.897	1251.98	221.255	1487.8	5.63417
samp. OSG	[21668] Zelenski ME (2018)	8.69349	50.6468	0.166024	0.146609	0.312021	325.6	143.184	2453	91.2123	2453	1186.55	325.6	1135.41	17.1318
samp. OSG	[21668] Zelenski ME (2018)	8.80317	51.2069	0.195159	0.151501	0.273382	290.861	143.866	2149.23	91.1999	2149.23	1394.77	290.861	1173.3	14.9391
samp. OSG	[21668] Zelenski ME (2018)	9.40845	50.5876	0.185762	0.158797	0.322645	309.314	143.889	2536.52	90.5478	2536.52	1327.61	309.314	1229.81	17.6283
samp. OSG	[21668] Zelenski ME (2018)	9.87252	50.1033	0.187124	0.166438	0.30627	291.556	144.975	2407.78	90.0417	2407.78	1337.34	291.556	1288.98	16.6082
samp. OMI	[21668] Zelenski ME (2018)	10.6346	48.796	0.178997	0.181096	0.258432	250.624	145.288	2030.78	89.1007	2030.78	1279.26	250.624	1402.5	13.9776
samp. OSG	[21668] Zelenski ME (2018)	9.37666	50.424	0.191461	0.161882	0.251037	288.877	145.358	1973.56	90.5491	1973.56	1368.34	288.877	1253.69	13.5773
samp. OSG	[21668] Zelenski ME (2018)	9.94426	50.4114	0.171064	0.174369	0.167091	249.01	145.642	1313.61	90.0317	1313.61	1222.56	249.01	1350.4	9.01945
samp. OSG	[21668] Zelenski ME (2018)	9.80085	50.6311	0.190163	0.165185	0.20146	301.197	146.089	1583.81	90.1999	1583.81	1359.07	301.197	1279.28	10.8414
samp. OMI	[21668] Zelenski ME (2018)	10.6587	48.827	0.182979	0.182947	0.241166	228.944	146.299	1895.11	89.0849	1895.11	1307.72	228.944	1416.83	12.9537
samp. OMI	[21668] Zelenski ME (2018)	10.7299	48.7631	0.178718	0.182641	0.264398	269.698	146.307	2077.67	89.0072	2077.67	1277.26	269.698	1414.47	14.2007
samp. OMI	[21668] Zelenski ME (2018)	11.2327	48.4696	0.196491	0.191093	0.228207	208.266	146.392	1793.27	88.4897	1793.27	1404.29	208.266	1479.92	12.2498
samp. MI	[21668] Zelenski ME (2018)	11.2327	48.4696	0.196491	0.191093	0.228207	208.266	146.392	1793.27	88.4897	1793.27	1404.29	208.266	1479.92	12.2498
samp. OMI	[21668] Zelenski ME (2018)	11.157	48.3257	0.201744	0.191874	0.216902	233.824	146.576	1704.44	88.5282	1704.44	1441.83	233.824	1485.97	11.6283
samp. OMI	[21668] Zelenski ME (2018)	11.2128	48.4165	0.186106	0.191602	0.228825	200.468	146.586	1798.13	88.4966	1798.13	1330.07	200.468	1483.86	12.2667
samp. MI	[21668] Zelenski ME (2018)	11.2128	48.4165	0.186106	0.191602	0.228825	200.468	146.586	1798.13	88.4966	1798.13	1330.07	200.468	1483.86	12.2667
samp. OSG	[21668] Zelenski ME (2018)	9.80336	50.1675	0.181991	0.17015	0.24204	282.592	146.723	1902.83	90.116	1902.83	1300.66	282.592	1317.73	12.9689
samp. OMI	[21668] Zelenski ME (2018)	10.5354	48.9207	0.191927	0.180168	0.237682	215.22	146.913	1867.73	89.2159	1867.73	1371.67	215.22	1395.31	12.7132
samp. OSG	[21668] Zelenski ME (2018)	10.4111	49.1706	0.199827	0.183201	0.121544	256.658	147.002	955.534	89.3781	955.534	1428.13	256.658	1418.81	6.50016
samp. OSG	[21668] Zelenski ME (2018)	9.14873	50.5322	0.203702	0.157753	0.260265	283.196	147.072	2046.11	90.7755	2046.11	1455.83	283.196	1221.72	13.9122
samp. OMI	[21668] Zelenski ME (2018)	11.0648	48.388	0.182953	0.188773	0.242138	218.112	147.166	1902.74	88.6252	1902.74	1307.53	218.112	1461.95	12.9292
samp. OSG	[21668] Zelenski ME (2018)	9.49415	50.251	0.200049	0.164842	0.299585	292.817	147.237	2355.23	90.4122	2355.23	1429.72	292.817	1276.62	15.9962
samp. OSG	[21668] Zelenski ME (2018)	9.72677	50.5726	0.197903	0.167108	0.291476	-	147.496	2291.48	90.2565	2291.48	1414.38	-	1294.17	15.5359
samp. OMI	[21668] Zelenski ME (2018)	10.6149	48.8537	0.192086	0.181844	0.228991	218.383	147.803	1799.44	89.1302	1799.44	1372.81	218.383	1408.3	12.1746
samp. OSG	[21668] Zelenski ME (2018)	9.39022	50.3883	0.183628	0.165217	0.327756	298.41	147.828	2576.7	90.5306	2576.7	1312.36	298.41	1279.53	17.4303
samp. OMI	[21668] Zelenski ME (2018)	11.0577	48.4458	0.191987	0.193005	0.234281	225.019	147.836	1841	88.6437	1841	1372.1	225.019	1494.73	12.453
samp. OMI	[21668] Zelenski ME (2018)	11.3798	48.2265	0.194816	0.196022	0.221127	206.609	147.976	1737.64	88.3047	1737.64	1392.31	206.609	1518.1	11.7427
samp. OMI	[21668] Zelenski ME (2018)	11.1929	48.3699	0.187163	0.192424	0.237174	216.869	148.3	1863.74	88.5048	1863.74	1337.62	216.869	1490.23	12.5674
samp. OSG	[21668] Zelenski ME (2018)	9.67996	50.316	0.247412	0.169603	0.2005	217.257	148.407	1576.26	90.2542	1576.26	1768.21	217.257	1313.5	10.6212
samp. OMI	[21668] Zelenski ME (2018)	11.054	48.3849	0.183452	0.190226	0.242535	217.884	148.42	1905.87	88.6344	1905.87	1311.1	217.884	1473.21	12.8411
samp. OMI	[21668] Zelenski ME (2018)	11.4354	48.0937	0.192451	0.195235	0.234405	211.07	148.63	1841.98	88.2256	1841.98	1375.42	211.07	1512	12.393
samp. MI	[21668] Zelenski ME (2018)	11.4354	48.0937	0.192451	0.195235	0.234405	211.07	148.63	1841.98	88.2256	1841.98	1375.42	211.07	1512	12.393
samp. OMI	[21668] Zelenski ME (2018)	11.2256	48.2527	0.205012	0.192729	0.222606	216.19	148.727	1749.26	88.4503	1749.26	1465.19	216.19	1492.59	11.7615
samp. MI	[21668] Zelenski ME (2018)	11.2256	48.2527	0.205012	0.192729	0.222606	216.19	148.727	1749.26	88.4503	1749.26	1465.19	216.19	1492.59	11.7615
samp. OMI	[21668] Zelenski ME (2018)	11.1798	48.373	0.183771	0.19144	0.241716	215.685	148.753	1899.43	88.5174	1899.43	1313.38	215.685	1482.61	12.769
samp. OSG	[21668] Zelenski ME (2018)	9.28852	50.455	0.260799	0.170036	0.232035	247.8	148.795	1824.17	90.6348	1824.17	1863.89	247.8	1316.85	12.2596
samp. OSG	[21668] Zelenski ME (2018)	9.97114	49.8706	0.187195	0.174578	0.283061	282.785	149.093	2225.33	89.91	2225.33	1337.85	282.785	1352.02	14.9257
samp. OMI	[21668] Zelenski ME (2018)	11.4482	48.062	0.199236	0.196272	0.229789	210.858	149.288	1805.71	88.2071	1805.71	1423.91	210.858	1520.03	12.0955
samp. OMI	[21668] Zelenski ME (2018)	11.0967	48.4488	0.179302	0.188835	0.244363	223.134	149.372	1920.23	88.6088	1920.23	1281.44	223.134	1462.43	12.8554
samp. OSG	[21668] Zelenski ME (2018)	9.9326	49.7594	0.201555	0.169379	0.316913	296.149	149.433	2491.45	89.9249	2491.45	1440.48	296.149	1311.76	16.6728
samp. OMI	[21668] Zelenski ME (2018)	11.4626	48.1008	0.184961	0.19649	0.228699	209.541	149.517	1797.14	88.2025	1797.14	1321.88	209.541	1521.72	12.0197
samp. OSG	[21668] Zelenski ME (2018)	10.5498	49.5278	0.175267	0.185065	0.258043	231.647	149.589	2028.64	89.321	2028.64	1252.61	231.647	1433.23	13.5614
samp. OMI	[21668] Zelenski ME (2018)	11.3879	48.1605	0.185016	0.194295	0.231662	202.858	149.858	1820.42	88.2832	1820.42	1322.28	202.858	1504.72	12.1477
samp. OSG	[21668] Zelenski ME (2018)	10.706	49.6355	0.179512	0.185467	0.309407	213.815	149.969	2432.44	89.201	2432.44	1282.94	213.815	1436.35	16.2196
samp. OSG	[21668] Zelenski ME (2018)	9.74706	50.0661	0.230856	0.16633	0.315329	300.539	150.52	2479.01	90.1492	2479.01	1649.89	300.539	1288.14	16.4696
samp. OMI	[21668] Zelenski ME (2018)	10.7959	48.8424	0.189145	0.190805	0.219627	222.493	150.695	1725.85	88.963	1725.85	1351.78	222.493	1477.69	11.4526
samp. OSG	[21668] Zelenski ME (2018)	9.54305	50.0317	0.251574	0.169484	0.23976	257.988	151.226	1884.9	90.3294	1884.9	1797.96	257.988	1312.57	12.4642
samp. OMI	[21668] Zelenski ME (2018)	12.4066	47.3769	0.208091	0.204736	0.22017	222.56	151.284	1730.12	87.1852	1730.12	1487.19	222.56	1585.58	11.4363
samp. OSG	[21668] Zelenski ME (2018)	10.2473	49.7761	0.196703	0.175416	0.23354	263.312	151.336	1836.01	89.6419	1836.01	1405.81	263.312	1358.51	12.132
samp. OSG	[21668] Zelenski ME (2018)	9.85039	49.7177	0.195634	0.176813	0.263324	245.722	151.459	2070.16	89.9924	2070.16	1398.16	245.722	1369.33	13.6681
samp. OSG	[21668] Zelenski ME (2018)	10.0493	50.0391	0.211093	0.175484	0.237089	243.26	151.496	1863.91	89.8698	1863.91	1508.64	243.26	1359.04	12.3034
samp. OSG	[21668] Zelenski ME (2018)	10.7734	49.3529	0.189025	0.184061	0.244695	236.773	151.804	1923.7	89.0849	1923.7	1350.93	236.773	1425.46	12.6722
samp. OSG	[21668] Zelenski ME (2018)	10.5429	48.7181	0.140217	0.185789	0.224538	209.043	151.86	1765.24	89.1691	1765.24	1002.11	209.043	1438.85	11.6241
samp. OSG	[21668] Zelenski ME (2018)	10.1883	49.8109	0.192949	0.179144	0.214985	238.398	152.016	1690.14	89.7018	1690.14	1378.97	238.398	1387.38	11.1182
samp. OSG	[21668] Zelenski ME (2018)	10.3658	49.8558	0.175989	0.181557	0.178297	236.677	152.112	1401.71	89.5496	1401.71	1257.76	236.677	1406.07	9.21495
samp. OSG	[21668] Zelenski ME (2018)	11.4257	48.9522	0.206264	0.194319	0.208775	224.669	152.122	1641.31	88.4169	1641.31	1474.13	224.669	1504.9	10.7894
samp. OSG	[21668] Zelenski ME (2018)	10.3706	49.8624	0.201588	0.178779	0.254527	259.177	152.215	2001	89.5465	2001	1440.71	259.177	1384.55	13.1458
samp. OMI	[21668] Zelenski ME (2018)	11.592	48.0426	0.187613	0.198396	0.201454	193.268	152.292	1583.04	88.0724	1583.04	1340.84	193.268	1536.48	10.3948
samp. OSG	[21668] Zelenski ME (2018)	9.98563	49.7536	0.190069	0.175677	0.286813	289.385	152.323	2254.82	89.8755	2254.82	1358.39	289.385	1360.54	14.8029
samp. OSG	[21668] Zelenski ME (2018)	10.7723	49.5879	0.193674	0.188478	0.246152	244.988	152.362	1935.16	89.132	1935.16	1384.15	244.988	1459.67	12.701
samp. OSG	[21668] Zelenski ME (2018)	10.8866	49.2328	0.189812	0.185908	0.234019	240.952	152.369	1839.77	88.959	1839.77	1356.56	240.952	1439.76	12.0744
samp. OSG	[21668] Zelenski ME (2018)	10.4532	49.1522	0.175074	0.182291	0.226583	242.605	152.423	1781.31	89.3361	1781.31	1251.22	242.605	1411.76	11.6867
samp. OSG	[21668] Zelenski ME (2018)	11.0048	49.3141	0.185158	0.190529	0.232582	223.803	152.771	1828.48	88.8688	1828.48	1323.29	223.803	1475.55	11.9687
samp. OMI	[21668] Zelenski ME (2018)	10.7392	48.5364	0.232205	0.19315	0.287243	241.586	152.841	2257.19	88.953	2257.19	1659.53	241.586	1495.86	14.7682
samp. OSG	[21668] Zelenski ME (2018)	10.8257	49.5294	0.205894	0.190116	0.201485	225.741	152.854	1584.01	89.0726	1584.01	1471.49	225.741	1472.35	10.3629
samp. OSG	[21668] Zelenski ME (2018)	10.8326	49.4462	0.200929	0.188545	0.237565	237.845	153.103	1867.65	89.05	1867.65	1436	237.845	1460.19	12.1987
samp. OSG	[21668] Zelenski ME (2018)	10.3317	49.4151	0.201741	0.182642	0.230368	248.228	153.217	1811.07	89.4972	1811.07	1441.81	248.228	1414.47	11.8203
samp. OSG	[21668] Zelenski ME (2018)	11.1299	49.1358	0.195373	0.189305	0.232698	225.696	153.31	1829.39	88.7203	1829.39	1396.3	225.696	1466.07	11.9326
samp. OMI	[21668] Zelenski ME (2018)	11.4333	48.0369	0.233354	0.198904	0.205386	199.677	153.344	1613.95	88.2153	1613.95	1667.75	199.677	1540.42	10.525
samp. MI	[21668] Zelenski ME (2018)	11.4333	48.0369	0.233354	0.198904	0.205386	199.677	153.344	1613.95	88.2153	1613.95	1667.75	199.677	1540.42	10.525
samp. OSG	[21668] Zelenski ME (2018)	11.3986	49.0263	0.199792	0.192254	0.241603	261.125	153.377	1899.39	88.4566	1899.39	1427.88	261.125	1488.91	12.3838
samp. OSG	[21668] Zelenski ME (2018)	10.4333	49.2842	0.187501	0.172687	0.280476	276.101	153.402	2205	89.3797	2205	1340.04	276.101	1337.37	14.374
samp. OSG	[21668] Zelenski ME (2018)	11.6911	48.71	0.198957	0.198704	0.215025	236.951	153.651	1690.45	88.1278	1690.45	1421.91	236.951	1538.86	11.0019
samp. OSG	[21668] Zelenski ME (2018)	11.249	48.9949	0.207152	0.191067	0.219802	224.688	153.976	1728	88.5844	1728	1480.48	224.688	1479.72	11.2225
samp. OSG	[21668] Zelenski ME (2018)	10.6642	49.4552	0.209631	0.190822	0.187526	237.196	154.298	1474.26	89.2036	1474.26	1498.2	237.196	1477.82	9.55464
samp. OSG	[21668] Zelenski ME (2018)	10.7963	49.2365	0.191101	0.190803	0.243079	234.79	154.451	1911	89.0413	1911	1365.76	234.79	1477.67	12.3728
samp. OSG	[21668] Zelenski ME (2018)	10.6531	49.3663	0.211235	0.188052	0.243716	254.52	154.56	1916.01	89.1963	1916.01	1509.66	254.52	1456.37	12.3965
samp. OSG	[21668] Zelenski ME (2018)	11.4207	48.9916	0.189204	0.192738	0.226509	214.478	154.664	1780.73	88.4296	1780.73	1352.21	214.478	1492.66	11.5135
samp. OSG	[21668] Zelenski ME (2018)	10.6517	49.2276	0.193785	0.190282	0.227402	230.602	154.777	1787.75	89.1704	1787.75	1384.95	230.602	1473.64	11.5505
samp. OSG	[21668] Zelenski ME (2018)	11.1727	49.9101	0.205397	0.194391	0.145269	233.761	155.018	1142.05	88.8379	1142.05	1467.94	233.761	1505.46	7.36721
samp. OSG	[21668] Zelenski ME (2018)	11.2102	48.8066	0.193537	0.19219	0.233998	223.569	155.119	1839.61	88.5803	1839.61	1383.17	223.569	1488.42	11.8594
samp. OSG	[21668] Zelenski ME (2018)	10.2291	49.8044	0.260938	0.188549	0.173408	202.565	155.209	1363.27	89.6636	1363.27	1864.88	202.565	1460.22	8.78345
samp. OSG	[21668] Zelenski ME (2018)	11.0495	48.5275	0.194519	0.190196	0.234765	221.236	155.458	1845.64	88.6681	1845.64	1390.2	221.236	1472.97	11.8723
samp. OSG	[21668] Zelenski ME (2018)	11.3704	48.4911	0.186118	0.19326	0.235794	237.266	155.64	1853.73	88.3696	1853.73	1330.16	237.266	1496.71	11.9104
samp. OSG	[21668] Zelenski ME (2018)	11.32	48.9127	0.199132	0.191637	0.257859	228.607	155.69	2027.2	88.5035	2027.2	1423.16	228.607	1484.14	13.0207
samp. OSG	[21668] Zelenski ME (2018)	11.7856	48.7205	0.193834	0.19879	0.260727	-	155.808	2049.74	88.0456	2049.74	1385.3	-	1539.53	13.1555
samp. OSG	[21668] Zelenski ME (2018)	10.7796	49.452	0.191589	0.182361	0.21864	228.726	155.898	1718.87	89.0989	1718.87	1369.25	228.726	1412.29	11.0256
samp. OSG	[21668] Zelenski ME (2018)	10.5072	49.1037	0.203546	0.187356	0.24177	245.218	155.932	1900.71	89.2775	1900.71	1454.71	245.218	1450.98	12.1894
samp. OSG	[21668] Zelenski ME (2018)	11.1518	48.5835	0.193564	0.191151	0.231061	217.683	156.261	1816.52	88.5868	1816.52	1383.37	217.683	1480.37	11.6249
samp. OSG	[21668] Zelenski ME (2018)	10.9507	49.0009	0.196296	0.195974	0.217689	222.31	156.768	1711.39	88.8545	1711.39	1402.9	222.31	1517.72	10.9167
samp. OSG	[21668] Zelenski ME (2018)	10.8081	49.2465	0.223039	0.194224	0.223396	226.751	156.786	1756.26	89.0326	1756.26	1594.02	226.751	1504.17	11.2017
samp. OSG	[21668] Zelenski ME (2018)	10.9917	49.4881	0.197694	0.191793	0.165753	179.501	157.036	1303.09	88.9154	1303.09	1412.89	179.501	1485.34	8.29802
samp. OSG	[21668] Zelenski ME (2018)	11.0598	49.3397	0.186699	0.194226	0.149381	211.284	157.11	1174.38	88.8246	1174.38	1334.31	211.284	1504.19	7.47492
samp. OSG	[21668] Zelenski ME (2018)	10.9593	49.4411	0.185862	0.190522	0.166636	191.149	157.936	1310.03	88.9351	1310.03	1328.32	191.149	1475.5	8.29468
samp. OSG	[21668] Zelenski ME (2018)	13.2994	47.2796	0.188946	0.221383	0.214152	193.443	158.225	1683.59	86.3644	1683.59	1350.36	193.443	1714.5	10.6404
samp. OSG	[21668] Zelenski ME (2018)	10.8147	49.4512	0.19762	0.19282	0.174173	228.793	158.235	1369.28	89.0671	1369.28	1412.36	228.793	1493.29	8.6535
samp. OSG	[21668] Zelenski ME (2018)	11.4084	48.266	0.176846	0.19236	0.251351	228.914	158.396	1976.03	88.2872	1976.03	1263.89	228.914	1489.73	12.4752
samp. OSG	[21668] Zelenski ME (2018)	11.1652	49.2294	0.209527	0.193786	0.240075	237.439	158.498	1887.38	88.7077	1887.38	1497.45	237.439	1500.78	11.9079
samp. OSG	[21668] Zelenski ME (2018)	11.0216	49.0647	0.204801	0.190634	0.234648	232.555	158.58	1844.72	88.8034	1844.72	1463.67	232.555	1476.37	11.6327
samp. OSG	[21668] Zelenski ME (2018)	8.79857	51.1209	0.180847	0.142733	0	-	159.738	-	91.1906	-	1292.48	-	1105.39	-
samp. OSG	[21668] Zelenski ME (2018)	11.9117	48.2671	0.283698	0.224296	0.214784	210.269	159.843	1688.56	87.8335	1688.56	2027.54	210.269	1737.06	10.5639
samp. OSG	[21668] Zelenski ME (2018)	11.1434	49.3015	0.211237	0.196727	0.16188	202.945	160.559	1272.64	88.7419	1272.64	1509.67	202.945	1523.55	7.92633
samp. OSG	[21668] Zelenski ME (2018)	11.0033	49.3894	0.199863	0.190978	0.132141	209.542	160.914	1038.85	88.8853	1038.85	1428.39	209.542	1479.03	6.45592
samp. OSG	[21668] Zelenski ME (2018)	11.5195	48.8163	0.191676	0.195887	0.169774	191.308	161.464	1334.7	88.3042	1334.7	1369.87	191.308	1517.05	8.26627
samp. OSG	[21668] Zelenski ME (2018)	11.2879	48.613	0.225808	0.20264	0.190131	188.513	162.446	1494.74	88.4698	1494.74	1613.81	188.513	1569.35	9.20146
samp. OSG	[21668] Zelenski ME (2018)	11.4894	48.7589	0.150069	0.198705	0.179699	107.805	162.559	1412.72	88.319	1412.72	1072.52	107.805	1538.88	8.69052
samp. OSG	[21668] Zelenski ME (2018)	11.3152	48.6053	0.194565	0.198512	0.1546	193.704	163.161	1215.41	88.4435	1215.41	1390.52	193.704	1537.38	7.44918
samp. OSG	[21668] Zelenski ME (2018)	11.3451	48.6806	0.180852	0.189393	0.27572	166.505	164.299	2167.61	88.4324	2167.61	1292.52	166.505	1466.76	13.1931
samp. OSG	[21668] Zelenski ME (2018)	11.9477	48.6188	0.211345	0.21191	0.196523	201.621	165.028	1544.99	87.8788	1544.99	1510.45	201.621	1641.14	9.36198
samp. OSG	[21668] Zelenski ME (2018)	10.8948	49.9384	0.201188	0.188691	0.0811451	260.106	165.068	637.933	89.0907	637.933	1437.86	260.106	1461.32	3.86468
samp. OMI	[21668] Zelenski ME (2018)	11.7063	47.8718	0.184562	0.200312	0.102326	174.645	165.621	804.086	87.9313	804.086	1319.03	174.645	1551.32	4.85497
samp. OSG	[21668] Zelenski ME (2018)	11.5184	48.6471	0.208913	0.206766	0.179022	186.594	167.26	1407.41	88.2692	1407.41	1493.07	186.594	1601.3	8.4145
samp. OSG	[21668] Zelenski ME (2018)	11.9543	48.5803	0.190174	0.203504	0.163606	160.209	167.429	1286.21	87.8645	1286.21	1359.14	160.209	1576.04	7.68212
samp. OSG	[21668] Zelenski ME (2018)	11.4426	48.9519	0.21045	0.19544	0.169176	178.98	170.005	1330	88.4016	1330	1504.05	178.98	1513.59	7.82331
samp. OSG	[21668] Zelenski ME (2018)	11.9597	48.6777	0.207394	0.214423	0.172169	188.225	171.087	1353.53	87.881	1353.53	1482.21	188.225	1660.6	7.91134
samp. OMI	[21668] Zelenski ME (2018)	12.8486	46.9817	0.222385	0.222923	0.160033	148.711	171.581	1257.56	86.6927	1257.56	1589.35	148.711	1726.43	7.32921
samp. OSG	[21668] Zelenski ME (2018)	12.5364	48.0435	0.151122	0.202653	0.190673	121.952	171.968	1499	87.225	1499	1080.04	121.952	1569.45	8.71676
samp. OSG	[21668] Zelenski ME (2018)	10.7776	49.3829	0.23667	0.192746	0.153685	169.714	172.261	1208.21	89.0871	1208.21	1691.44	169.714	1492.72	7.01384
samp. OSG	[21668] Zelenski ME (2018)	11.7946	48.2453	0.207624	0.196823	0.182614	231.148	173.595	1435.64	87.9339	1435.64	1483.85	231.148	1524.3	8.2701
samp. OSG	[21668] Zelenski ME (2018)	12.5885	48.087	0.211766	0.214721	0.185349	123.325	175.3	1457.15	87.1889	1457.15	1513.46	123.325	1662.91	8.31232
samp. OSG	[21668] Zelenski ME (2018)	16.9776	44.0513	0.135768	0.281075	0.0962762	33.6092	178.272	756.889	82.2152	756.889	970.308	33.6092	2176.79	4.24569
samp. OSG	[21668] Zelenski ME (2018)	13.9477	47.0426	0.149212	0.245541	0.135532	55.4996	180.972	1065.51	85.7328	1065.51	1066.4	55.4996	1901.59	5.88769
samp. OSG	[21668] Zelenski ME (2018)	13.0455	46.9121	0.204936	0.223563	0.206464	106.042	182.285	1623.14	86.499	1623.14	1464.64	106.042	1731.39	8.90442
samp. OSG	[21668] Zelenski ME (2018)	13.9603	47.1786	0.141759	0.222961	0.130364	59.2844	185.07	1024.88	85.757	1024.88	1013.13	59.2844	1726.72	5.53778
samp. OSG	[21668] Zelenski ME (2018)	14.0512	46.8475	0.150918	0.224818	0.122653	64.3017	187.054	964.256	85.5909	964.256	1078.58	64.3017	1741.1	5.15496
samp. OSG	[21668] Zelenski ME (2018)	14.6632	46.1739	0.154993	0.246788	0.108368	51.6746	187.306	851.947	84.8721	851.947	1107.71	51.6746	1911.25	4.54841
samp. OSG	[21668] Zelenski ME (2018)	16.3242	44.84	0.2224	0.287919	0.144338	125.987	190.534	1134.73	83.0333	1134.73	1589.46	125.987	2229.79	5.95554
samp. OSG	[21668] Zelenski ME (2018)	15.8136	45.0485	0.162035	0.261682	0.184027	71.4452	190.912	1446.75	83.5402	1446.75	1158.04	71.4452	2026.6	7.57813
samp. OSG	[21668] Zelenski ME (2018)	14.1996	46.7534	0.148567	0.254646	0.0936241	42.4579	199.243	736.039	85.4359	736.039	1061.79	42.4579	1972.11	3.69418
samp. OSG	[21668] Zelenski ME (2018)	12.0797	48.1075	0.224431	0.217089	0.0874132	116.05	204.959	687.211	87.6473	687.211	1603.97	116.05	1681.25	3.35292
samp. OSG	[21668] Zelenski ME (2018)	12.8355	47.7566	0.195223	0.224651	0.0869639	91.1035	222.508	683.678	86.8919	683.678	1395.23	91.1035	1739.81	3.0726
samp. K6-06	[23078] Tobelko DP (2019)	11.78	48.33	0.16	0.18	0.27	-	159	-	87.9657	-	1143.49	-	1394.01	-
samp. K6-06	[23078] Tobelko DP (2019)	12.83	48.9	0.2	0.23	0.13	-	162	-	87.1638	-	1429.37	-	1781.24	-
samp. K6-06	[23078] Tobelko DP (2019)	13.85	47.6	0.16	0.23	0.13	-	162	-	85.9613	-	1143.49	-	1781.24	-
samp. K6-06	[23078] Tobelko DP (2019)	12.7	48.61	0.18	0.2	0.15	-	164	-	87.2112	-	1286.43	-	1548.9	-
samp. K6-06	[23078] Tobelko DP (2019)	12.3	47.85	0.22	0.22	0.14	-	165	-	87.3913	-	1572.3	-	1703.79	-
samp. K6-06	[23078] Tobelko DP (2019)	12.67	48.38	0.19	0.22	0.14	-	167	-	87.1846	-	1357.9	-	1703.79	-
samp. K6-06	[23078] Tobelko DP (2019)	13.18	47.18	0.21	0.21	0.16	-	168	-	86.4456	-	1500.83	-	1626.35	-
samp. K6-06	[23078] Tobelko DP (2019)	12.42	47.55	0.22	0.22	0.13	-	171	-	87.2139	-	1572.3	-	1703.79	-
samp. K6-06	[23078] Tobelko DP (2019)	16.27	47.57	0.18	0.27	0.1	-	172	-	83.8947	-	1286.43	-	2091.02	-
samp. K6-06	[23078] Tobelko DP (2019)	13.09	47.75	0.18	0.22	0.14	-	173	-	86.6651	-	1286.43	-	1703.79	-
samp. K6-06	[23078] Tobelko DP (2019)	16.32	45.76	0.17	0.26	0.12	-	176	-	83.321	-	1214.96	-	2013.57	-
samp. K6-06	[23078] Tobelko DP (2019)	12	48.36	0.2	0.21	0.15	-	177	-	87.7751	-	1429.37	-	1626.35	-
samp. K6-06	[23078] Tobelko DP (2019)	13.65	47.57	0.19	0.23	0.15	-	178	-	86.1284	-	1357.9	-	1781.24	-
samp. K6-06	[23078] Tobelko DP (2019)	13.57	47.93	0.15	0.22	0.15	-	180	-	86.2879	-	1072.02	-	1703.79	-
samp. K6-06	[23078] Tobelko DP (2019)	16.4	45.07	0.17	0.26	0.19	-	188	-	83.0401	-	1214.96	-	2013.57	-
samp. K6-06	[23078] Tobelko DP (2019)	18.96	43.5	0.15	0.31	0.11	-	189	-	80.3444	-	1072.02	-	2400.8	-
samp. K6-06	[23078] Tobelko DP (2019)	19.67	42.73	0.15	0.32	0.09	-	195	-	79.4675	-	1072.02	-	2478.24	-
samp. K6-06	[23078] Tobelko DP (2019)	18.79	42.36	0.16	0.3	0.08	-	199	-	80.0658	-	1143.49	-	2323.35	-
samp. K6-06	[23078] Tobelko DP (2019)	22.03	40.92	0.15	0.36	0.07	-	214	-	76.7946	-	1072.02	-	2788.02	-
samp. E11	[3787] Marcelot G. (1981)	-	27.72	0.69	0.65	-	19	178	158	-	158	4931.31	19	5033.93	0.88764
samp. 7181001	[4719] Aoki K-I (1974)	14.28	44.99	0.08	0.19	0.29	-	144	-	84.8786	-	571.746	-	1471.46	-
samp. DG-10	[4989] Aoki K-I (1977)	26.82	34.77	0.18	0.36	0.08	-	57	-	69.7863	-	1286.43	-	2788.02	-
samp. DG-27	[4989] Aoki K-I (1977)	21.05	40.42	0.1	0.25	0.192	-	109	-	77.3811	-	714.683	-	1936.13	-
samp. A°	[9312] GHIARA M. R. (1977)	12.02	46.85	-	0.21	-	425	122	995	87.4123	995	-	425	1626.35	8.15574
samp. S°	[9312] GHIARA M. R. (1977)	10.37	47.66	-	0.19	-	475	122	1349	89.1166	1349	-	475	1471.46	11.0574
samp. AR0301-10	[9610] WADE J. A. (2006)	21.6	39.1	0.07	0.27	-	-	154	691	76.3319	691	500.278	-	2091.02	4.48701
samp. AR0301-2	[9610] WADE J. A. (2006)	22.7	39	0.12	0.42	-	10.93	156	777	75.3753	777	857.62	10.93	3252.69	4.98077
samp. AR0301-14	[9610] WADE J. A. (2006)	21.1	38.1	0.1	0.32	-	34.33	158	937	76.2869	937	714.683	34.33	2478.24	5.93038
samp. AR0302-4	[9610] WADE J. A. (2006)	21.8	39	0.1	0.32	-	-	162	783	76.1185	783	714.683	-	2478.24	4.83333
samp. AR0302-5	[9610] WADE J. A. (2006)	23.2	37.9	0.1	0.33	-	14.22	166	326	74.428	326	714.683	14.22	2555.69	1.96386
samp. AR0301-1	[9610] WADE J. A. (2006)	21.5	38.7	0.09	0.33	-	3.09	168	542	76.2298	542	643.215	3.09	2555.69	3.22619
samp. AR0301-15	[9610] WADE J. A. (2006)	18.2	41	0.1	0.33	-	25.28	172	1039	80.0542	1039	714.683	25.28	2555.69	6.0407
samp. AR0301-13	[9610] WADE J. A. (2006)	20.2	38.6	0.07	0.36	-	30.12	176	937	77.296	937	500.278	30.12	2788.02	5.32386
samp. AR0301-12	[9610] WADE J. A. (2006)	17.8	41.8	0.08	0.23	-	-	183	1144	80.7093	1144	571.746	-	1781.24	6.25137
*Fo is calculated as molar Mg/(Mg+Fe)

## Sheet: Table C2 - Citations
[4989] Aoki K-I (1977) Petrology of ultramafic and mafic inclusions in alkali basalt from Nakamura, Dogo, Oki Islands. J Jpn Assoc of Mineral Petrol and Econ Geol 72(2):75-84.
[4719] Aoki K-I, Shiba I (1974) Petrology of Websterite Inclusions of Itinome-Gata, Japan. Sci Rep Tohuku Univ 3(12):395-417.
[13241] Davì M, De Rosa R, Barca D (2009) A LA-ICP-MS study of minerals in the Rocche Rosse magmatic enclaves: evidence of a mafic input triggering the latest silicic eruption of Lipari Island (Aeolian Arc, Italy). J Volcanol Geotherm Res 182:45-56.
[19952] Forni F, Ellis BS, Bachmann O et al (2015) Erupted cumulate fragments in rhyolites from Lipari (Aeolian Islands). Contrib Mineral Petrol 170(5)-6:49
[9312] Ghiara MR, Lirer L (1976) Mineralogy and geochemistry of the «Low potassium» series of the roccamonfina volcanic suite (Campania, South Italy). Bull Volcanol 40(1):39-56.
[11037] Ghiara MR, Lirer L, Munno R (1979) Mineralogy and geochemistry of the <<Low Potassium>> series of the Campania Volcanics (South Italy). Chem Geol 26:29-49
[21387] Kamenetsky VS, Zelenski M, Gurenko A, et al (2017) Silicate-sulfide liquid immiscibility in modern arc basalt (Tolbachik volcano, Kamchatka): Part II. Composition, liquidus assemblage and fractionation of the silicate melt. Chem Geol 471:92-110.
[3787] Marcelot G (1981) Geochimie des laves de l'ile d'Erromango (Nouvelles Hebrides); implications petrogenetiques. Bull Soc Géol Fr 7(4):367-376.
[23078] Tobelko DP, Portnyagin MV, Krasheninnikov E et al (2019) Compositions and Formation Conditions of Primitive Magmas of the Karymsky Volcanic Center, Kamchatka: Evidence from Melt Inclusions and Trace-Element Thermobarometry. Petrology 27(3):243-264.
[9610] Wade JA, Plank T, Melson WG et al (2006) The volatile content of magmas from Arenal volcano, Costa Rica. J Volcanol Geotherm Res 157(1-3):94-120.
[21668] Zelenski M, Kaminetsky VS, Mavrogenes JA et al (2018) Silicate-sulfide liquid immiscibility in modern arc basalt (Tolbachik volcano, Kamchatka): Part I. Occurrence and compositions of sulfide melts. Chem Geol 478:102-111.
Note: Data for this dataset were selected based on those convergent margin olivine analyses on GEOROC that contained either Co or CoO for comparison with Ohakune olivine.
